# Supplementary material
Source: MDPI journal article supplement (https://www.mdpi.com/2227-9717/9/5/791)
Supplement: s1 [file s1]

# Supplementary materials for Processing technologies for crisis response on the example of COVID-19 pandemic— injection molding and FFF case study

Bogna Sztorch <sup>1</sup>, Dariusz Brzakalski <sup>2</sup>, Marek Jałbrzykowski <sup>3</sup> and Robert E. Przekop <sup>1,\*</sup>

<sup>1</sup> Centre for Advanced Technologies, Adam Mickiewicz University in Poznań, Uniwersytetu Poznańskiego 10, 61-614, Poznań, Poland; bogna.sztorch@amu.edu.pl

<sup>2</sup> Faculty of Chemistry, Adam Mickiewicz University in Poznań, Uniwersytetu Poznańskiego 8, 61-614, Poznań, Poland; dariusz.brzakalski@amu.edu.pl

<sup>3</sup> Faculty of Mechanical Engineering, Białystok University of Technology, Wiejska 45C, 15-351 Białystok, Poland;

\* Correspondence: [r.przekop@gmail.com](mailto:r.przekop@gmail.com), [rprzekop@amu.edu.pl](mailto:rprzekop@amu.edu.pl)

Table S1 -Project chronology

| Data       | Task                                                                                                                                                                                                                                                                                                                        |
|------------|-----------------------------------------------------------------------------------------------------------------------------------------------------------------------------------------------------------------------------------------------------------------------------------------------------------------------------|
| March 23rd | Decision made to start the process of manufacturing protective helmets for medical services using FFF 3D printing technology. Preparation of a project for FFF printers based on the available PRUSA model.                                                                                                                 |
| March 24th | A launch of FFF 3D printing production of protective helmets made of PET.                                                                                                                                                                                                                                                   |
| March 27th | Verification of printing results, calculation of printing output and the amount of production waste.                                                                                                                                                                                                                        |
| March 28th | Critical verification of the usefulness of 3D printing technology for the production of protective elements. Making a decision to switch to injection technology, setting the conditions for the manufacturing of the required injection mold with an industrial partner, the company STER INSTITUTE, CEO Maciej Szymański. |
| March 29th | Start of designing an improved helmet body model and an injection mold for glass fiber reinforced polyamide-6 (w / w 15%).                                                                                                                                                                                                  |
| March 31st | Completion of the design and modelling of the improved helmet body by the industrial partner, the company STER INSTITUTE, CEO Maciej Szymański.                                                                                                                                                                             |
| April 1st  | Start of the tool (injection mold) manufacturing in the STER INSTITUTE tool shop.                                                                                                                                                                                                                                           |
| April 4th  | Completion of the tool manufacturing.                                                                                                                                                                                                                                                                                       |
| April 5th  | Tests and corrections of the tool in the tool shop and injection molding department of STER INSTITUTE.                                                                                                                                                                                                                      |
| April 6th  | Installation of the mold on the ENGEL e-victory injection molding machine at the Laboratory of Technological Processes of the Centre for Advanced Technologies of Adam Mickiewicz University in                                                                                                                             |

|           |                                                                                                                                                                                        |
|-----------|----------------------------------------------------------------------------------------------------------------------------------------------------------------------------------------|
|           | Poznań, technological tests, optimization of production parameters                                                                                                                     |
| April 7th | Start of production at the Laboratory of Technological Processes of the Centre for Advanced Technologies of Adam Mickiewicz University, exceeding the capacity of 1000 pieces per day. |

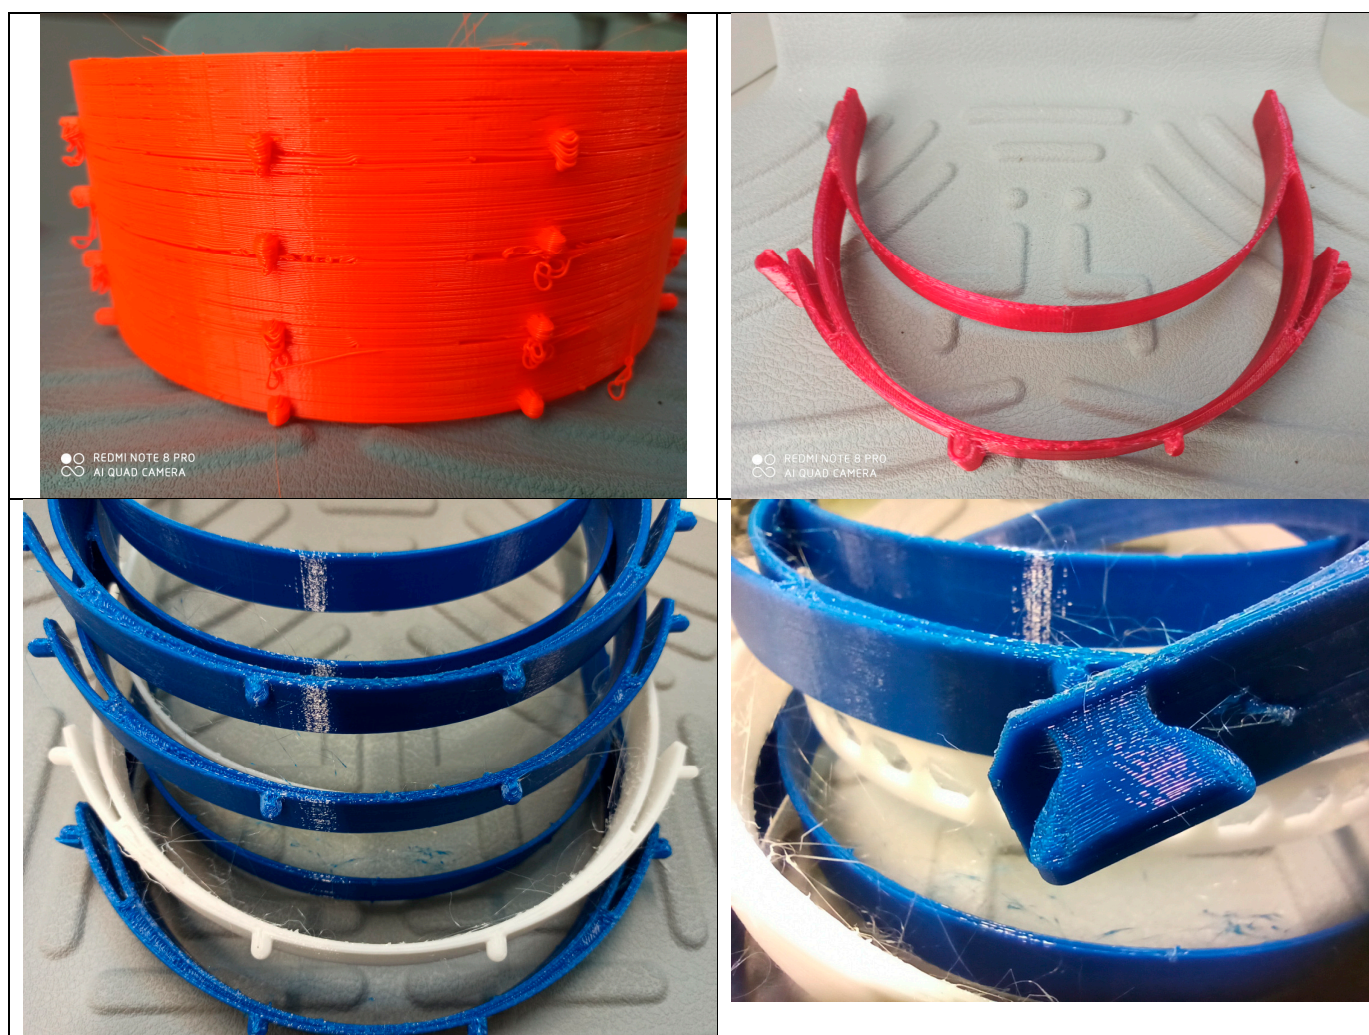

Figure S1: Protective helmet body made with FFF 3D printing technique.

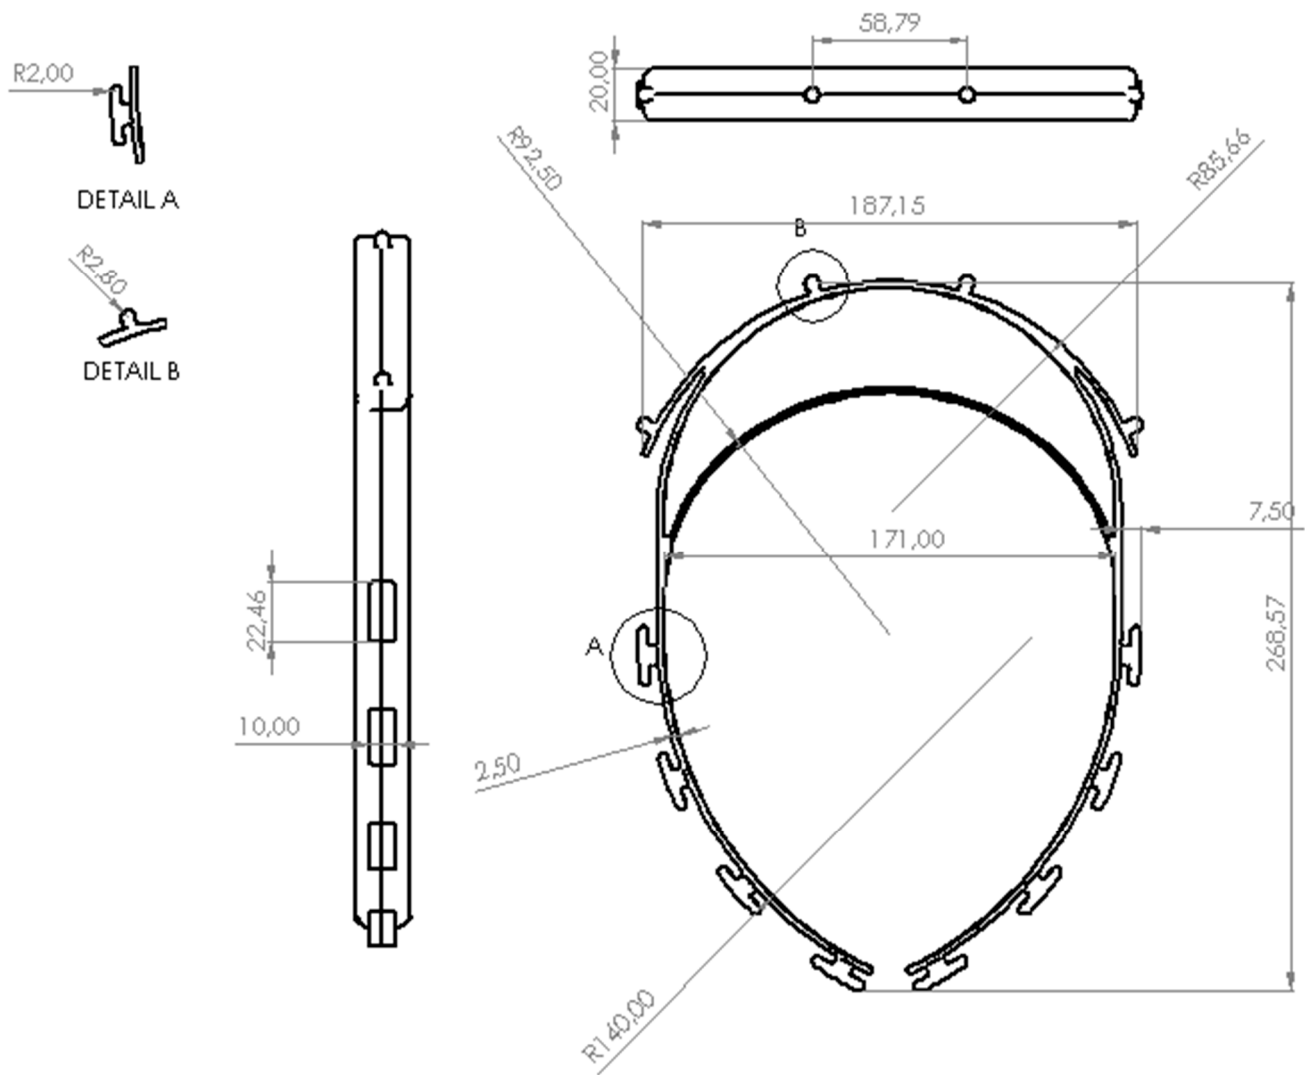

Figure S2: Technical drawing of protective helmet body design for Injection molding production method.

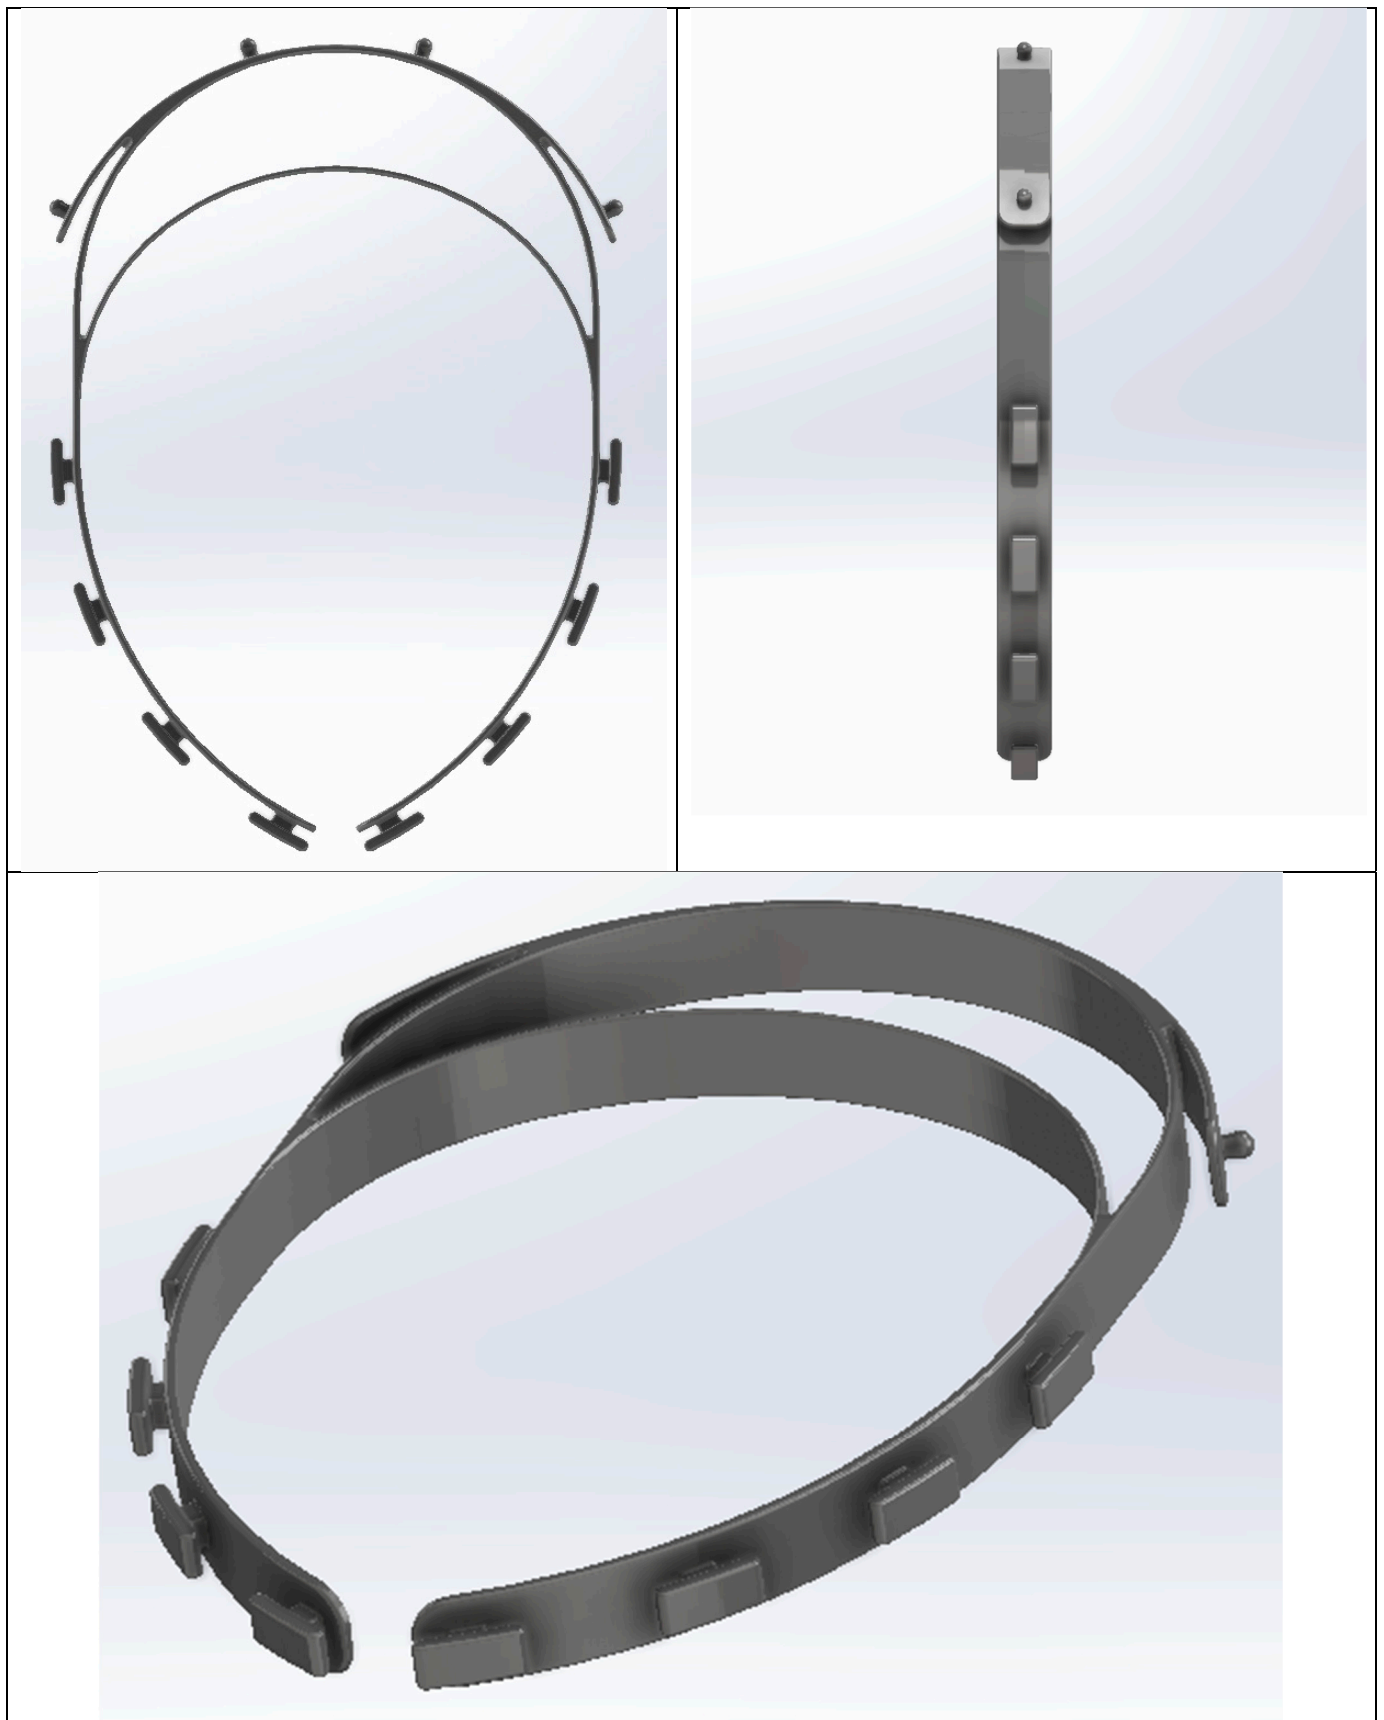

Figure S3: 3D model of protective helmet body design for Injection molding production method.



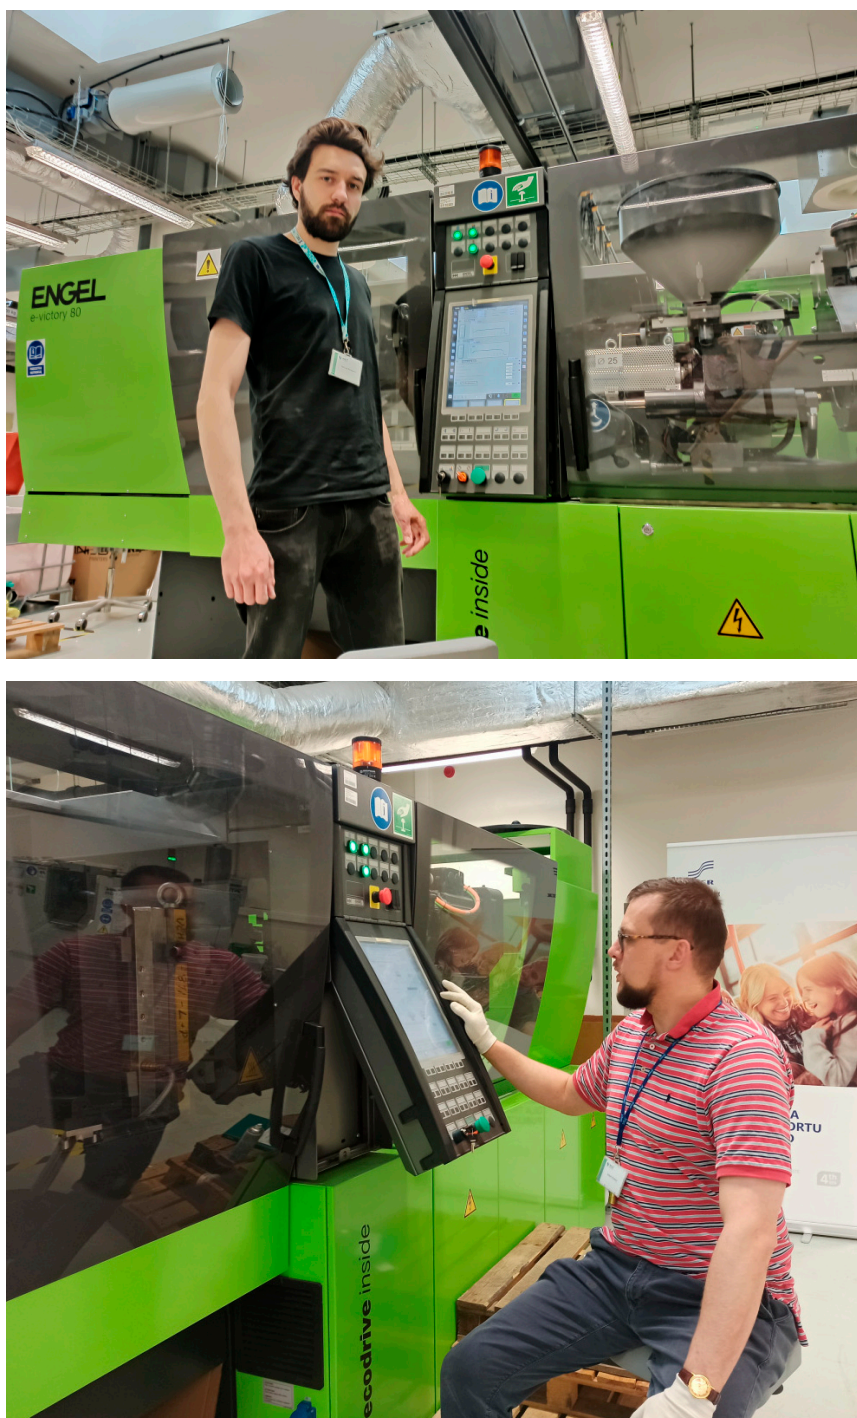

Figure S4: technological tests and optimization of injection molding.



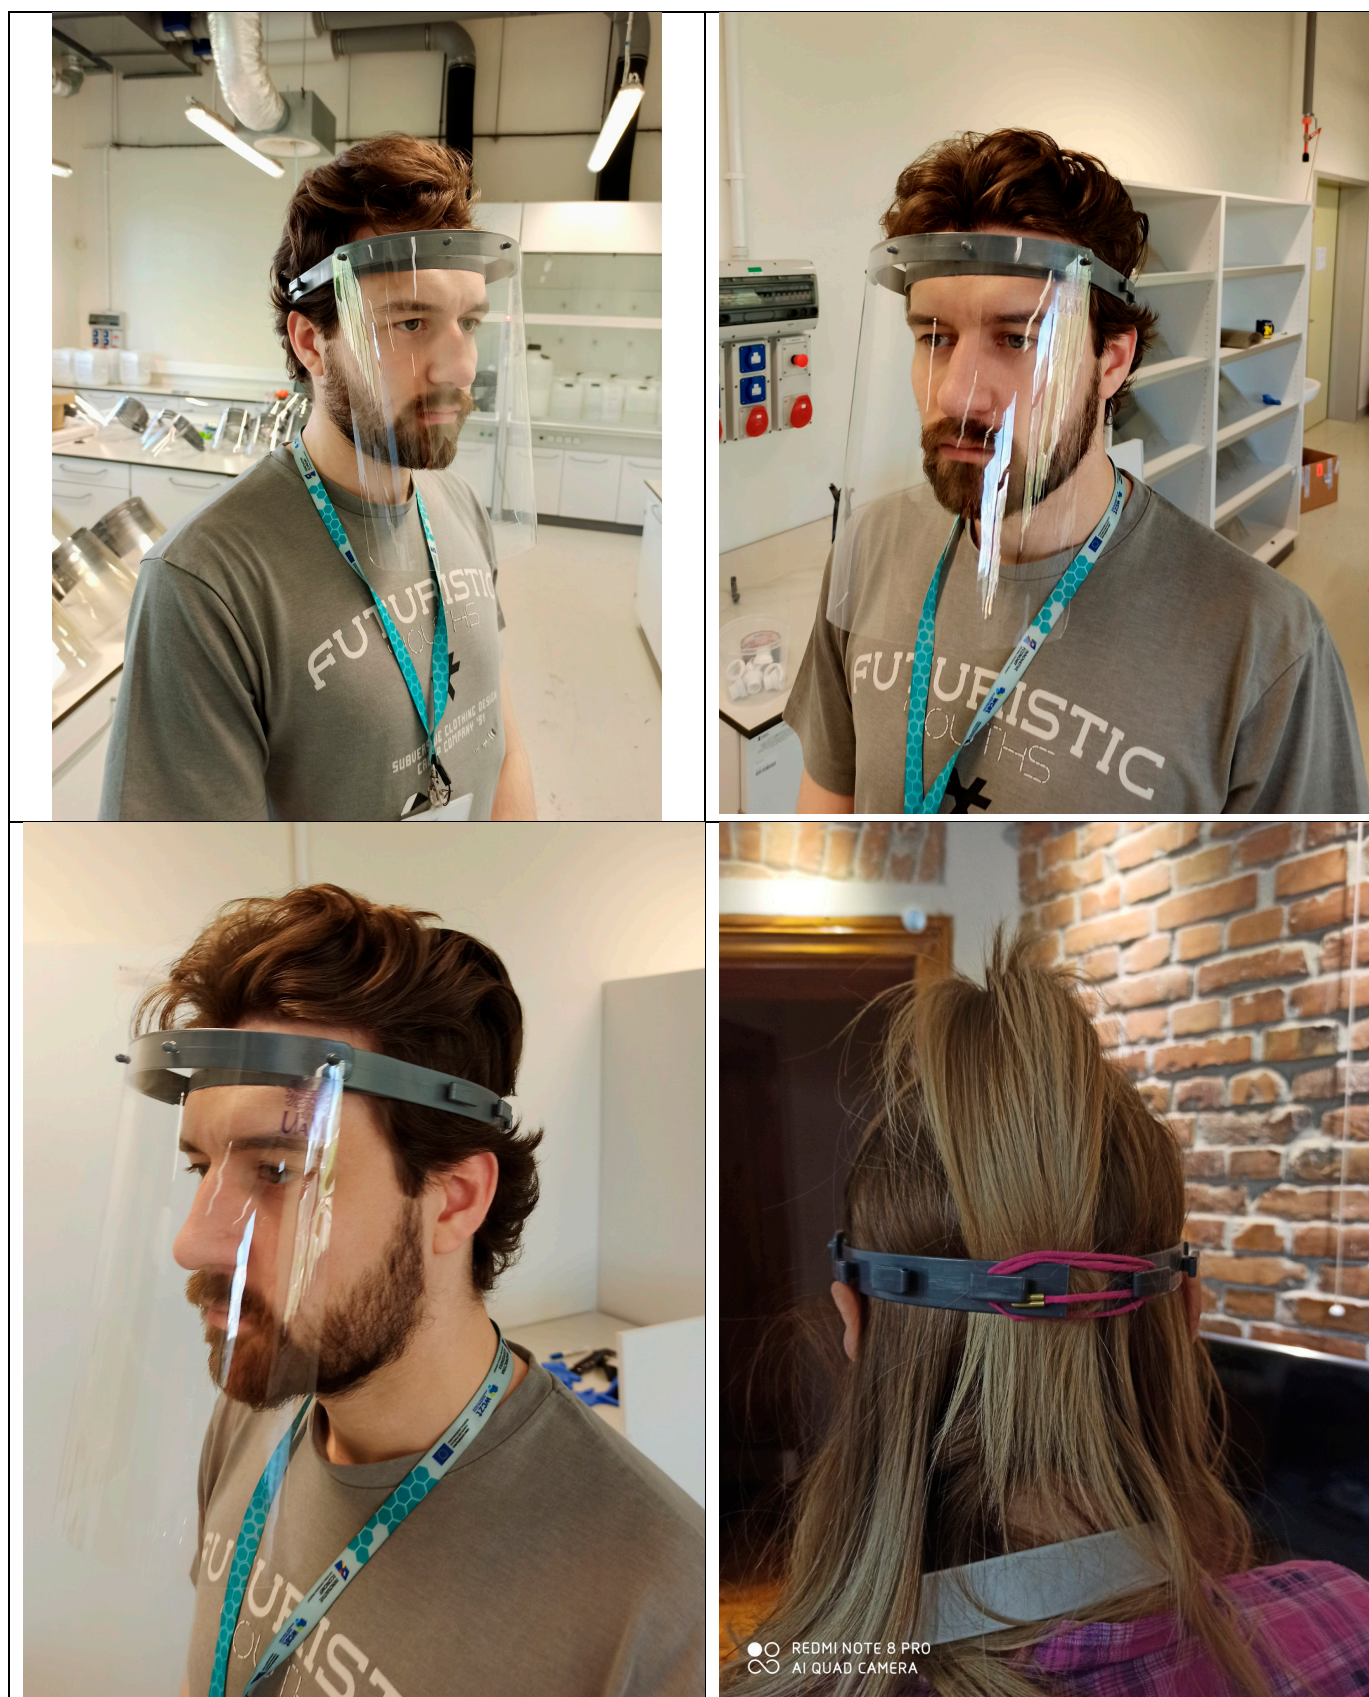

Figure S5: Protective helmet fully assebled and tested for the comfort of using.



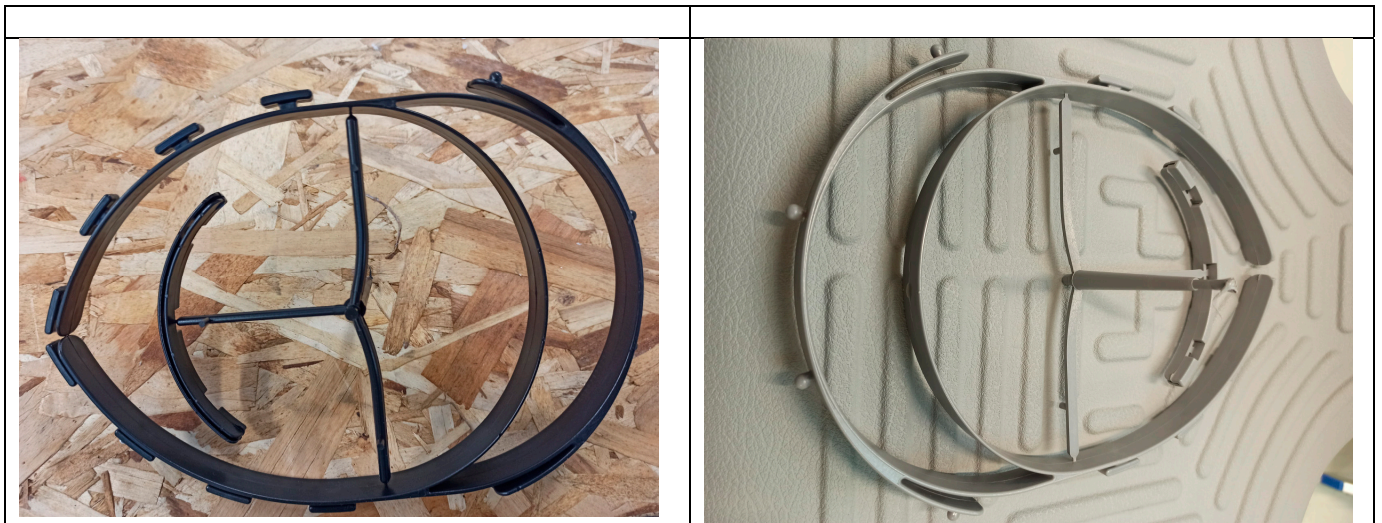

Figure S6: The protective shield detail as received during injection molding process (with sprue remaining).

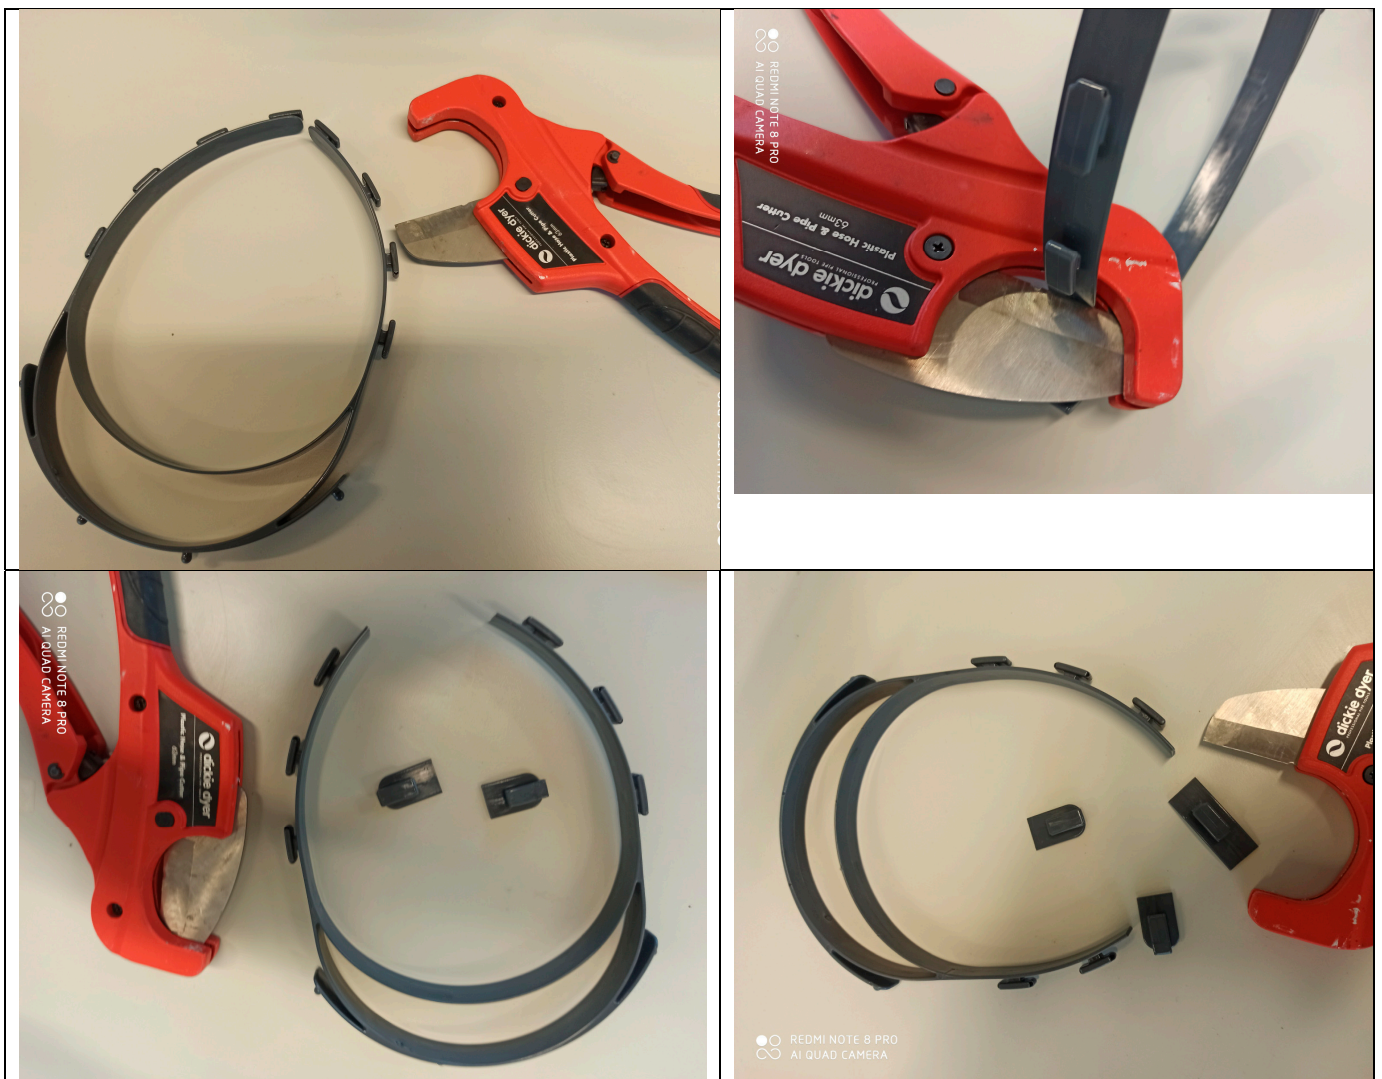

Figure S7 : Correction of the protective shield band for the head size of a particular user.



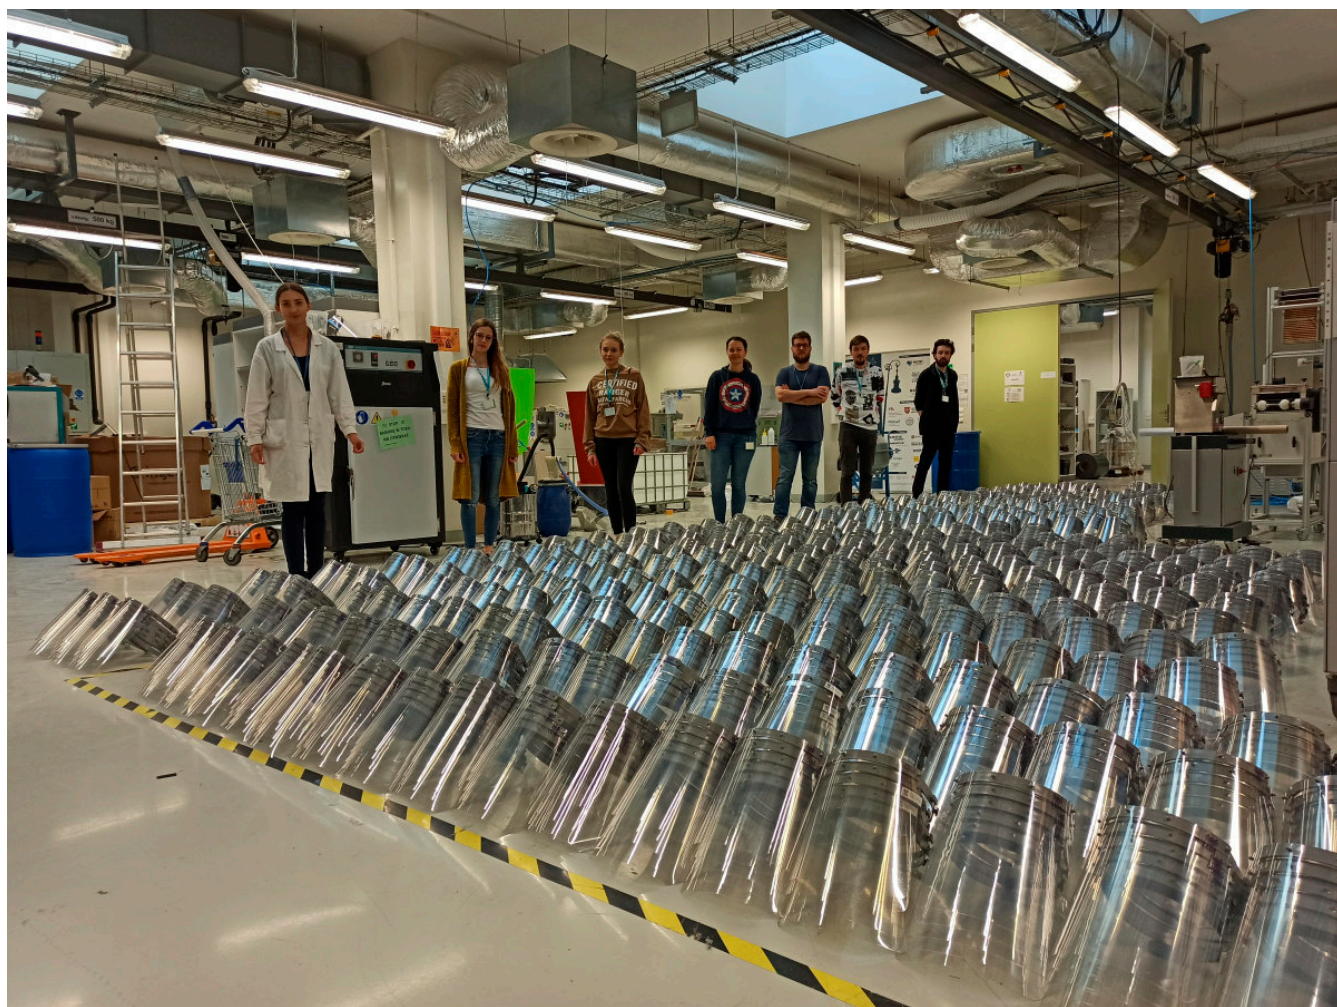

Figure S8: The technological team dealing with the study of the production process of the protective helmets
